# Supplementary material for: Expression Profiles of Long Noncoding RNAs and Messenger RNAs in Mn-Exposed Hippocampal Neurons of Sprague–Dawley Rats Ascertained by Microarray: Implications for Mn-Induced Neurotoxicity
Source: PLOS journal article supplement (doi:10.1371/journal.pone.0145856), 2016-01-08
Supplement: S1 (10.1371/journal.pone.0145856.s001) [file journal.pone.0145856.s001]

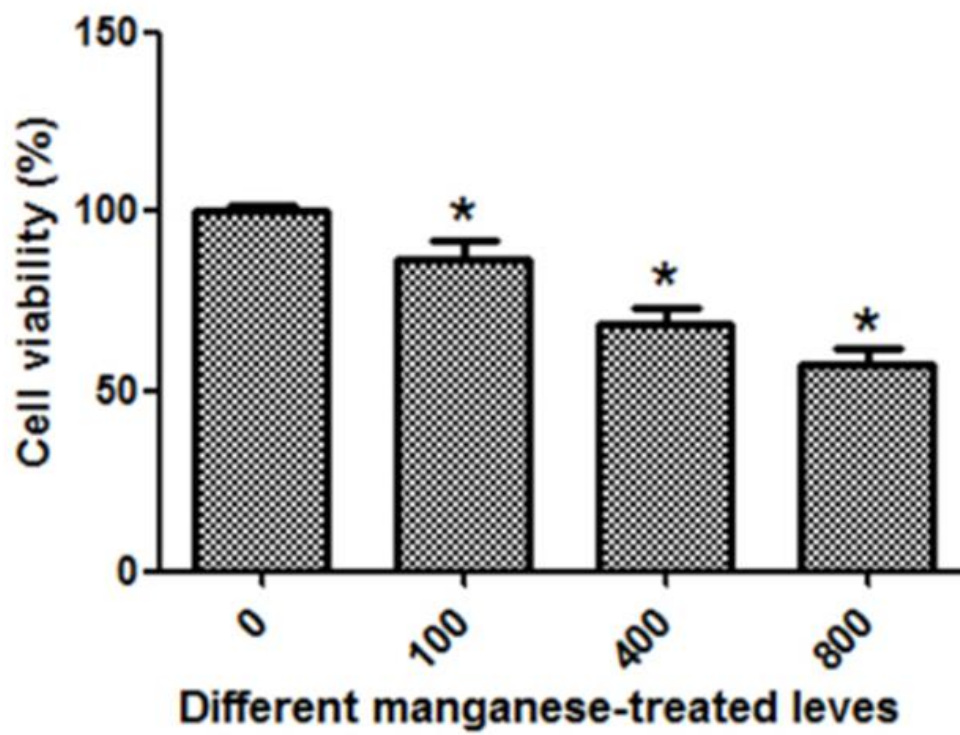

**S1 Fig. Cell viability of different manganese-treated primary hippocampal neurons.**

**\*:  $P < 0.05$  when compared with the control group.**
